# Supplementary material for: Prevalence and Risk Factors of Soil-Transmitted Helminthic Infections in the Pediatric Population in India: A Systematic Review and Meta-Analysis
Source: PubMed Central journal article supplement — J Lab Physicians. 2022 Aug 17;15(1):4–19. doi: 10.1055/s-0042-1751319 (PMC10104723; doi:10.1055/s-0042-1751319), 2022-08-17
Supplement: 10-1055-s-0042-1751319-s21121007.pdf [file 10-1055-s-0042-1751319-s21121007.pdf]

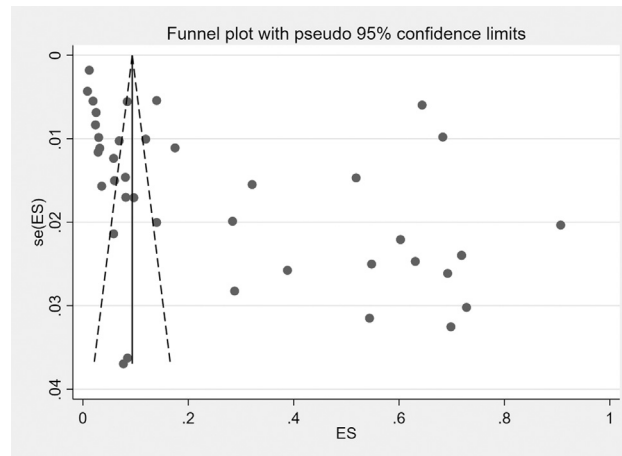

Supplementary Fig. 1 Begg's funnel plot evaluating the publication bias. ES, economic status.

Supplementary Table S1 Quality assessment tool (modified for the study)

| Quality assessment checklist for selected studies <sup>a</sup>                                                                             |                 |                                                                                          |                   |
|--------------------------------------------------------------------------------------------------------------------------------------------|-----------------|------------------------------------------------------------------------------------------|-------------------|
| 1. Was the sampling method representative of the target population?                                                                        |                 |                                                                                          |                   |
|                                                                                                                                            | A.              | Nonprobability sampling (including: purposive, quota, convenience and snowball sampling) | 0                 |
|                                                                                                                                            | B.              | Probability sampling (including: systematic recruitment, simple random)                  | 1                 |
| 2. Was sample size statistically determined and/or adequately powered?                                                                     |                 |                                                                                          |                   |
|                                                                                                                                            | A.              | No                                                                                       | 0                 |
|                                                                                                                                            | B.              | Yes                                                                                      | 1                 |
| 3. Was eligibility criterion clearly defined?                                                                                              |                 |                                                                                          |                   |
|                                                                                                                                            | A.              | No                                                                                       | 0                 |
|                                                                                                                                            | B.              | Yes                                                                                      | 1                 |
| 4. Was the diagnosis of parasitic infection objective?                                                                                     |                 |                                                                                          |                   |
|                                                                                                                                            | A.              | By history or indirect evidence evaluation solely                                        | 0                 |
|                                                                                                                                            | B.              | By laboratory test                                                                       | 1                 |
| 5. Were outcomes measures clearly defined and assessed (what all parasites were obtained)?                                                 |                 |                                                                                          |                   |
|                                                                                                                                            | A.              | No                                                                                       | 0                 |
|                                                                                                                                            | B.              | Yes                                                                                      | 1                 |
| 6. Did the statistical methods control for confounding factors (e.g., stratification/matching adjustment) when analyzing the associations? |                 |                                                                                          |                   |
|                                                                                                                                            | A.              | No                                                                                       | 0                 |
|                                                                                                                                            | B.              | Yes                                                                                      | 1                 |
| Scoring method:                                                                                                                            |                 |                                                                                          |                   |
| Grading                                                                                                                                    | 5 or 6 out of 6 | 3 or 4 out of 6                                                                          | 0,1 or 2 out of 6 |
| Risk of bias                                                                                                                               | Low             | Medium                                                                                   | High              |
| Study quality                                                                                                                              | Good            | Satisfactory                                                                             | Poor              |

<sup>a</sup>Adapted from: Wong WC, Cheung CS, Hart GJ. Development of a quality assessment tool for systematic reviews of observational studies (QATSO) of HIV prevalence in men having sex with men and associated risk behaviours. *Emerg Themes Epidemiol* 2008;5:23.

**Supplementary Table S2** Search strategy used and results extracted

| Search | Keywords                                                                                                                                                                                                   | Date      | Embase  | Scopus    | PubMed/Medline |
|--------|------------------------------------------------------------------------------------------------------------------------------------------------------------------------------------------------------------|-----------|---------|-----------|----------------|
| #5     | #1 AND #2 AND #3 AND #4                                                                                                                                                                                    | 16-Feb-21 | 574     | 293       | 520            |
| #4     | "india"/exp OR india OR "indian"/exp OR indian                                                                                                                                                             | 16-Feb-21 | 1198648 | 7,69,433  |                |
| #3     | "prevalence"/exp OR prevalence OR "risk factor"/exp OR "risk factor" OR (("risk"/exp OR risk) AND factor) OR "epidemiology"/exp OR epidemiology OR predispose OR "causal factor" OR (causal AND factor)    | 16-Feb-21 | 5632106 | 32,34,351 | 5290969        |
| #2     | "pediatric"/exp OR pediatric OR "child"/exp OR child OR kid OR "baby"/exp OR baby                                                                                                                          | 16-Feb-21 | 3769433 | 33,86,511 | 3483579        |
| #1     | soil-transmitted helminth OR ("soil transmitted" AND ("helminth"/exp OR helminth)) OR "helminth"/exp OR helminth OR "ascaris"/exp OR ascaris OR "trichuris"/exp OR trichuris OR "hookworm"/exp OR hookworm | 16-Feb-21 | 184683  | 57,211    | 149187         |

**Supplementary Table S3** Quality assessment of studies selected for the review

| Sl. no | Author/year                         | Quality score 1 | Quality score 2 | Quality score 3 | Quality score 4 | Quality score 5 | Quality score 6 | Total |
|--------|-------------------------------------|-----------------|-----------------|-----------------|-----------------|-----------------|-----------------|-------|
| 1      | Narain et al/2000 <sup>25</sup>     | 0               | 0               | 1               | 1               | 1               | 1               | 4     |
| 2      | Subba and Singh/2020 <sup>12</sup>  | 0               | 0               | 1               | 1               | 1               | 0               | 3     |
| 3      | Devi/2009 <sup>15</sup>             | 1               | 0               | 1               | 1               | 1               | 0               | 4     |
| 4      | Wani and Ahmad/2009 <sup>26</sup>   | 0               | 0               | 1               | 1               | 1               | 0               | 3     |
| 5      | Wani and Amin/2016 <sup>27</sup>    | 0               | 0               | 1               | 1               | 1               | 0               | 3     |
| 6      | Wani et al/2008 (a) <sup>28</sup>   | 0               | 0               | 1               | 1               | 1               | 0               | 3     |
| 7      | Lone et al/2011 <sup>29</sup>       | 0               | 1               | 1               | 1               | 1               | 0               | 4     |
| 8      | Wani et al/2007 (a) <sup>30</sup>   | 0               | 0               | 1               | 1               | 1               | 0               | 3     |
| 9      | Wani et al/2008 (b) <sup>31</sup>   | 1               | 1               | 1               | 1               | 1               | 0               | 5     |
| 10     | Wani et al /2010 <sup>32</sup>      | 0               | 0               | 1               | 1               | 1               | 0               | 3     |
| 11     | Wani et al/2007(b) <sup>33</sup>    | 0               | 0               | 1               | 1               | 1               | 0               | 3     |
| 12     | Das et al/2019 <sup>9</sup>         | 0               | 0               | 1               | 1               | 1               | 0               | 3     |
| 13     | Chowdhury et al/1968 <sup>14</sup>  | 0               | 0               | 1               | 1               | 1               | 0               | 3     |
| 14     | Nawalinski et al/1978 <sup>34</sup> | 1               | 1               | 1               | 1               | 1               | 0               | 5     |
| 15     | Greenland et al/2015 <sup>16</sup>  | 1               | 1               | 1               | 1               | 1               | 0               | 5     |
| 16     | Mahapatra et al/2020 <sup>17</sup>  | 0               | 1               | 1               | 1               | 1               | 0               | 4     |
| 17     | Bora et al/2006 <sup>35</sup>       | 0               | 0               | 1               | 1               | 0               | 0               | 2     |
| 18     | Bansal et al/2018 <sup>18</sup>     | 0               | 1               | 1               | 1               | 1               | 0               | 4     |
| 19     | Awasthi et al/1997 <sup>36</sup>    | 1               | 0               | 1               | 1               | 1               | 0               | 4     |
| 20     | Ganguly et al/2017 <sup>10</sup>    | 1               | 1               | 1               | 1               | 1               | 1               | 6     |
| 21     | Bisht et al /2011 <sup>37</sup>     | 0               | 0               | 1               | 1               | 1               | 0               | 3     |
| 22     | Awasthi et al/2008 <sup>23</sup>    | 1               | 1               | 1               | 1               | 1               | 0               | 5     |
| 23     | Yunus et al/1979 <sup>24</sup>      | 0               | 0               | 1               | 1               | 1               | 0               | 3     |
| 24     | Chandi et al /2018 <sup>38</sup>    | 0               | 0               | 1               | 1               | 1               | 0               | 3     |
| 25     | Ranjan et al/2015 <sup>39</sup>     | 1               | 1               | 1               | 1               | 1               | 1               | 6     |
| 26     | DattaBanik et al/1978 <sup>40</sup> | 0               | 0               | 1               | 1               | 1               | 0               | 3     |
| 27     | Gupta et al /2020 <sup>19</sup>     | 1               | 1               | 1               | 1               | 1               | 1               | 6     |
| 28     | Dhaka et al/2020 <sup>41</sup>      | 1               | 1               | 1               | 1               | 1               | 0               | 5     |

**Supplementary Table S3** (Continued)

| Sl. no | Author/year                             | Quality score 1 | Quality score 2 | Quality score 3 | Quality score 4 | Quality score 5 | Quality score 6 | Total |
|--------|-----------------------------------------|-----------------|-----------------|-----------------|-----------------|-----------------|-----------------|-------|
| 29     | Tripathi et al/2014 <sup>42</sup>       | 0               | 0               | 1               | 1               | 1               | 0               | 3     |
| 30     | Choubisa et al/2012 <sup>43</sup>       | 0               | 0               | 1               | 1               | 1               | 0               | 3     |
| 31     | Shobha et al/2013 <sup>20</sup>         | 1               | 0               | 1               | 1               | 0               | 0               | 3     |
| 32     | Lakhani et al /2012 <sup>44</sup>       | 0               | 0               | 1               | 1               | 1               | 0               | 3     |
| 33     | Naish et al/2004 <sup>11</sup>          | 0               | 0               | 1               | 1               | 1               | 0               | 3     |
| 34     | Paul et al/1999 <sup>45</sup>           | 0               | 0               | 1               | 1               | 1               | 0               | 3     |
| 35     | Rangaiahagari et al/2013 <sup>46</sup>  | 0               | 0               | 1               | 1               | 1               | 0               | 3     |
| 36     | Aher and Kulkarni /2011 <sup>47</sup>   | 0               | 0               | 1               | 1               | 1               | 0               | 3     |
| 37     | Anbumani et al/2011 <sup>48</sup>       | 0               | 0               | 1               | 1               | 1               | 0               | 3     |
| 38     | Elkins /1984 <sup>49</sup>              | 1               | 0               | 1               | 1               | 1               | 0               | 4     |
| 39     | Kattula et al/2014 <sup>50</sup>        | 1               | 1               | 1               | 1               | 1               | 1               | 6     |
| 40     | Gopalakrishnan et al/2018 <sup>51</sup> | 0               | 0               | 1               | 1               | 1               | 0               | 3     |
| 41     | Christu Rajan et al/2020 <sup>13</sup>  | 1               | 1               | 1               | 1               | 1               | 1               | 6     |
| 42     | Ragunathan et al/2010 <sup>21</sup>     | 0               | 0               | 1               | 1               | 0               | 0               | 2     |
| 43     | Golia/2014 <sup>52</sup>                | 0               | 0               | 1               | 1               | 1               | 0               | 3     |
| 44     | Panda et al/2012 <sup>22</sup>          | 0               | 0               | 1               | 1               | 1               | 0               | 3     |

**Supplementary Table S4** Pooled prevalence of STH in different regions of India

|                  | Ascaris % prevalence (95% CI) | No. of studies giving the prevalence of <i>Ascaris</i> | <i>Trichuris</i> % prevalence (95% CI) | No. of studies giving the prevalence of <i>Trichuris</i> | Hookworm % prevalence (95% CI) | No. of studies giving the prevalence of hookworm |
|------------------|-------------------------------|--------------------------------------------------------|----------------------------------------|----------------------------------------------------------|--------------------------------|--------------------------------------------------|
| North East India | 46 (44–49)                    | 2                                                      | 12 (1–34)                              | 3                                                        | 2 (1–3)                        | 1                                                |
| North India      | 35 (22–50)                    | 19                                                     | 14 (7–22)                              | 15                                                       | 5 (1–13)                       | 9                                                |
| Central India    | 8 (6–10)                      | 2                                                      | –                                      | –                                                        | 4 (3–6)                        | 2                                                |
| East India       | 18 (3–42)                     | 4                                                      | 3 (1–6)                                | 3                                                        | 49 (25–74)                     | 4                                                |
| West India       | 3 (2–4)                       | 4                                                      | 1 (0–4)                                | 1                                                        | 1 (0–2)                        | 3                                                |
| South India      | 25 (9–47)                     | 10                                                     | 19 (5–38)                              | 9                                                        | 10 (4–17)                      | 10                                               |

Abbreviations: CI, confidence interval; STH, soil-transmitted helminths.
